# Supplementary material for: The perception of quinine taste intensity is associated with common genetic variants in a bitter receptor cluster on chromosome 12
Source: PubMed Central journal article supplement — Hum Mol Genet. 2010 Jul 30;19(21):4278–85. doi: 10.1093/hmg/ddq324 (PMC2951861; doi:10.1093/hmg/ddq324), 2010-07-30
Supplement: supp_ddq324_ddq324supp.pdf [file supp_ddq324_ddq324supp.pdf]

**Supplemental Table 1. Top 12 SNPs associated with ratings of quinine and PROP (solution, paper) taste intensity**

| Stimulus      | SNP        | Chr | Location(bp) | p-Value  | MAF  | Gene                        | Allele   | Type |
|---------------|------------|-----|--------------|----------|------|-----------------------------|----------|------|
| Quinine       | rs10772420 | 12  | 11065543     | 2.0E-15  | 0.48 | TAS2R19*                    | R299C    | Gen  |
|               | rs2010481  | 12  | 11071607     | 2.0E-15  | 0.48 | <i>PRR4</i> and <i>PRH1</i> | Intronic | Gen  |
|               | rs10772418 | 12  | 11062010     | 2.0E-15  | 0.48 | <i>PRR4</i> and <i>PRH1</i> | Intronic | Imp  |
|               | rs10845293 | 12  | 11074522     | 2.0E-15  | 0.48 | <i>PRR4</i> and <i>PRH1</i> | Intronic | Imp  |
|               | rs2900578  | 12  | 11071471     | 2.0E-15  | 0.48 | <i>PRR4</i> and <i>PRH1</i> | Intronic | Imp  |
|               | rs4763616  | 12  | 11076503     | 2.0E-15  | 0.48 | <i>PRR4</i> and <i>PRH1</i> | Intronic | Imp  |
|               | rs7134036  | 12  | 11076851     | 2.0E-15  | 0.48 | <i>PRR4</i> and <i>PRH1</i> | Intronic | Imp  |
|               | rs7953498  | 12  | 11073683     | 2.0E-15  | 0.48 | <i>PRR4</i> and <i>PRH1</i> | Intronic | Imp  |
|               | rs2060705  | 12  | 11080443     | 2.0E-15  | 0.48 | <i>PRR4</i> and <i>PRH1</i> | Intronic | Imp  |
|               | rs2443097  | 12  | 11098963     | 2.0E-15  | 0.48 | <i>PRR4</i> and <i>PRH1</i> | Intronic | Imp  |
|               | rs2597996  | 12  | 11099651     | 2.0E-15  | 0.48 | <i>PRR4</i> and <i>PRH1</i> | Intronic | Imp  |
|               | rs7955495  | 12  | 11204940     | 2.0E-15  | 0.48 | <i>PRR4</i> and <i>PRH1</i> | Intronic | Imp  |
| PROP solution | rs713598   | 7   | 141319814    | 1.6E-104 | 0.40 | TAS2R38                     |          | Imp  |
|               | rs10246939 | 7   | 141319073    | 9.7E-102 | 0.44 | TAS2R38                     | I296V†   | Gen  |
|               | rs1726866  | 7   | 141319174    | 5.6E-101 | 0.44 | TAS2R38                     | A262V†   | Gen  |
|               | rs7794708  | 7   | 141300106    | 1.6E-46  | 0.29 | Intergenic                  |          | Gen  |
|               | rs1285950  | 7   | 141283032    | 1.6E-46  | 0.29 | Intergenic                  |          | Imp  |
|               | rs1285944  | 7   | 141286444    | 1.6E-46  | 0.29 | Intergenic                  |          | Imp  |
|               | rs1285968  | 7   | 141293491    | 1.6E-46  | 0.29 | Intergenic                  |          | Imp  |
|               | rs1726867  | 7   | 141307169    | 4.7E-43  | 0.30 | Intergenic                  |          | Imp  |
|               | rs10464444 | 7   | 141178656    | 4.4E-42  | 0.29 | Intergenic                  |          | Imp  |
|               | rs9640357  | 7   | 141189567    | 4.4E-42  | 0.29 | Intergenic                  |          | Imp  |
|               | rs11765575 | 7   | 141184437    | 4.4E-42  | 0.29 | <i>LOC136242</i>            | Intronic | Imp  |
|               | rs2082551  | 7   | 141223655    | 1.5E-41  | 0.29 | Intergenic                  |          | Gen  |
| PROP paper    | rs10246939 | 7   | 141319073    | 1.5E-42  | 0.44 | TAS2R38                     | I296V†   | Gen  |
|               | rs713598   | 7   | 141319814    | 2.2E-42  | 0.40 | TAS2R38                     |          | Imp  |
|               | rs1726866  | 7   | 141319174    | 2.5E-42  | 0.44 | TAS2R38                     | A262V†   | Gen  |
|               | rs7794708  | 7   | 141300106    | 2.2E-24  | 0.29 | Intergenic                  |          | Gen  |
|               | rs1285950  | 7   | 141283032    | 2.2E-24  | 0.29 | Intergenic                  |          | Imp  |
|               | rs1285944  | 7   | 141286444    | 2.2E-24  | 0.29 | Intergenic                  |          | Imp  |
|               | rs1285968  | 7   | 141293491    | 2.2E-24  | 0.29 | Intergenic                  |          | Imp  |
|               | rs1726867  | 7   | 141307169    | 5.1E-21  | 0.30 | Intergenic                  |          | Imp  |
|               | rs10464444 | 7   | 141178656    | 4.3E-20  | 0.29 | Intergenic                  |          | Imp  |
|               | rs9640357  | 7   | 141189567    | 4.3E-20  | 0.29 | Intergenic                  |          | Imp  |
|               | rs11765575 | 7   | 141184437    | 4.3E-20  | 0.29 | <i>LOC136242</i>            | Intronic | Imp  |
|               | rs2163953  | 7   | 141214038    | 6.4E-20  | 0.29 | Intergenic                  |          | Gen  |

Chr=Chromosome; MAF= Minor Allele Frequency. Type, Gen=genotyped, Imp=imputed; Intergenic=marker falls between genes as annotated in Build 37.1. \*TAS2R19 has several gene symbol

aliases. †Alleles with reduced function in response to PROP in cell-based assays(6). §There are several alleles at this location: P119T, P119A, and P119S.

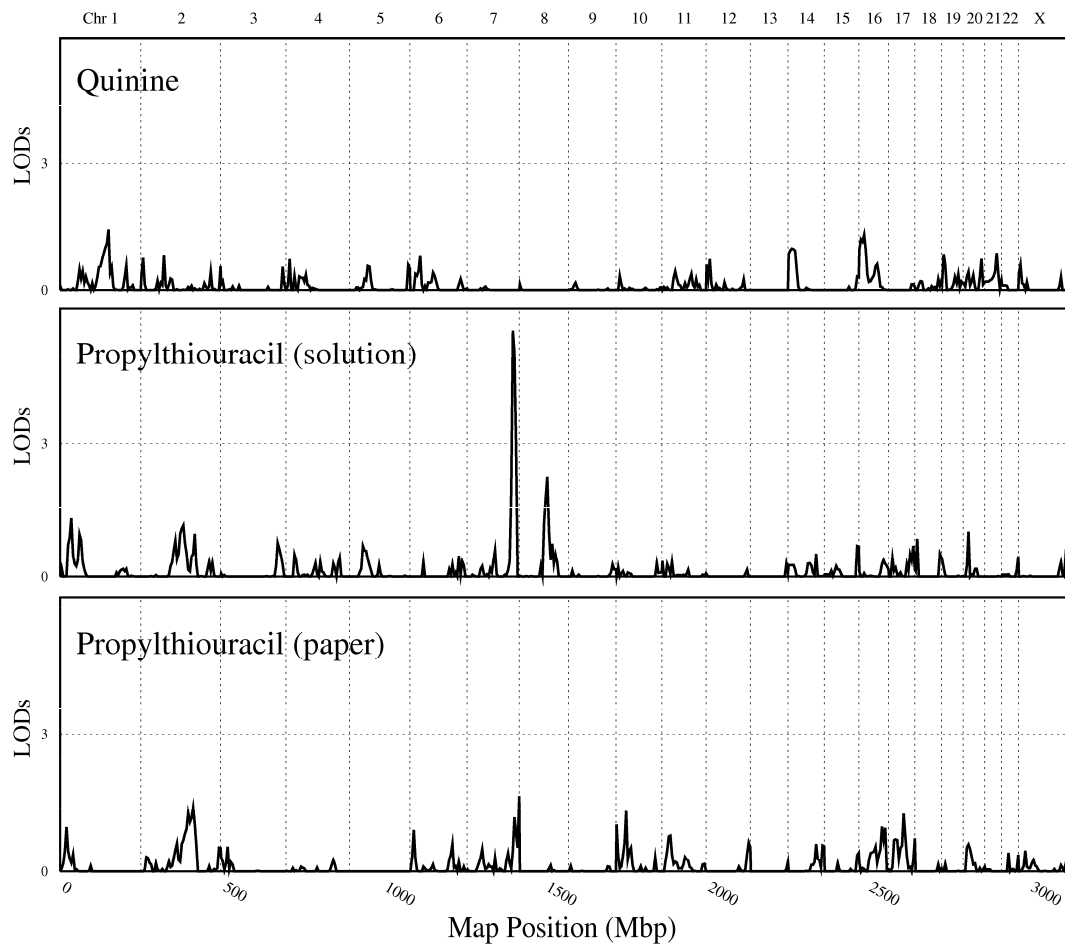

**Supplemental Figure 1.** Family based linkage for three taste traits. Linkage analyses for ratings of quinine bitterness (top), propylthiouracil in solution (middle) and propylthiouracil saturated paper (bottom) by dizygotic twin and sibling pairs. The peak on chromosome 7 is near the *TAS2R38* gene (middle panel). LOD=logarithm of odds. Chromosomes are denoted by vertical dotted lines (top); the horizontal dotted lines represent the criterion for genome-wide significance (LOD=3). Labels on the X-axis denote human genome map position in megabases (Mbs). For other details of the analysis, see text.
